# Supplementary material for: Dawn chorus interpretation differs when using songs or calls: the Dupont’s Lark Chersophilus duponti case
Source: PeerJ journal article supplement (doi:10.7717/peerj.5241), 2018-07-19
Supplement: Table_S1.pdf [file Table_S1.pdf]

|                  |      | Survey 1 (N=22) | Survey 2 (N=22) | Survey 3 (N=21) | Survey 4 (N=21) | Survey 5 (N=20) | Survey 6 (N=21) |
|------------------|------|-----------------|-----------------|-----------------|-----------------|-----------------|-----------------|
| Start time       | Song | 85.68 ± 6.22    | 63.40 ± 15.07   | 78.80 ± 10.23   | 74.29 ± 15.19   | 79.0 ± 11.54    | 76.43 ± 14.93   |
|                  | Call | 89.77 ± 4.49    | 77.5 ± 6.86     | 88.33 ± 8.70    | 87.62 ± 8.74    | 91.5 ± 5.87     | 89.52 ± 9.07    |
| End time         | Song | 12.04 ± 12.87   | 13.86 ± 7.70    | 13.81 ± 11.60   | 15.48 ± 12.24   | 13.5 ± 16.39    | 15.24 ± 13.74   |
|                  | Call | -1.36 ± 7.27    | -4.32 ± 12.28   | -0.95 ± 5.62    | -2.38 ± 7.00    | -2.75 ± 5.25    | -2.14 ± 5.14    |
| Performance time | Song | 14.50 ± 3.38    | 10.54 ± 3.36    | 12.33 ± 1.71    | 11.38 ± 2.86    | 12.5 ± 2.68     | 12.52 ± 3.88    |
|                  | Call | 13.18 ± 2.74    | 9.28 ± 2.17     | 7.86 ± 2.35     | 8.43 ± 1.83     | 9.05 ± 2.39     | 9.24 ± 2.16     |
| Output           | Song | 103.73 ± 48.69  | 116.31 ± 49.79  | 128.38 ± 46.65  | 125.29 ± 55.23  | 126.20 ± 40.80  | 130.38 ± 41.23  |
|                  | Call | 96.86 ± 59.58   | 59.18 ± 28.26   | 44.43 ± 26.86   | 48.76 ± 25.56   | 44.05 ± 23.20   | 45.71 ± 19.86   |
