# Supplementary material for: Dawn chorus interpretation differs when using songs or calls: the Dupont’s Lark Chersophilus duponti case
Source: PeerJ journal article supplement (doi:10.7717/peerj.5241), 2018-07-19
Supplement: Table_S2.pdf [file Table_S2.pdf]

|          | R        | R <sup>2</sup> | P        |
|----------|----------|----------------|----------|
| Survey 1 | - 0.9204 | 0.8472         | < 0.0001 |
| Survey 2 | - 0.4681 | 0.2191         | 0.0280   |
| Survey 3 | 0.2911   | 0.0847         | 0.2004   |
| Survey 4 | 0.0580   | 0.0034         | 0.8028   |
| Survey 5 | 0.3973   | 0.1579         | 0.0828   |
| Survey 6 | 0.2668   | 0.0712         | 0.2423   |
